# Supplementary material for: Social partnering alters sleep in fear-conditioned Wistar rats
Source: PLoS One. 2017 Oct 5;12(10):e0186017. doi: 10.1371/journal.pone.0186017 (PMC5628911; doi:10.1371/journal.pone.0186017)
Supplement: S2 File — (XLSX) [file pone.0186017.s002.xlsx]

## Sheet: Sheet1
Subject	Group	Day	NREM (min)	NREM Light	NREM Dark	REM (min)	REM Light	REM Dark
1	SI	Baseline	568.5	312.5	256	96.33	42.6667	53.6667
2	SI	Baseline	587.17	352.333	234.833	90.67	64.1667	26.5
3	SI	Baseline	485.74	298.333	187.403	86	58	28
4	SI	Baseline	632.17	341.5	290.667	138.33	77.5	60.8333
5	SI	Baseline	527.12	305.417	221.702	91.17	50.3333	40.8333
6	SI	Baseline	632.17	341.5	290.667	138.33	77.5	60.8333
7	SP	Baseline	354	238.167	115.833	97.5	80	17.5
8	SP	Baseline	505	321.5	183.5	96.33	77.8333	18.5
9	SP	Baseline	434.06	286	148.056	92.17	71.4444	20.7222
10	SP	Baseline	473.83	282.167	191.667	119.5	72.6667	46.8333
11	SP	Baseline	651.83	326.667	325.167	127.67	80.1667	47.5
12	SP	Baseline	443.17	298.333	144.833	82.67	56.5	26.1667
1	SI	Training	456.67	241.333	215.333	96.67	36.6667	60
2	SI	Training	503.83	290.167	213.667	107.33	61.8333	45.5
3	SI	Training	502	336	166	114.17	84.5	29.6667
4	SI	Training	454.68	236.167	218.51	148.17	78.3333	69.8333
5	SI	Training	479.33	288.667	190.667	105.42	60.5833	44.8333
6	SI	Training	454.68	236.167	218.51	148.17	78.3333	69.8333
7	SP	Training	495.33	313.833	181.5	128.17	91.3333	36.8333
8	SP	Training	554.5	329.667	224.833	188.5	114.667	73.8333
9	SP	Training	516.22	325.444	190.778	148.64	101.861	46.7778
10	SP	Training	526	336	190	123	84.5	38.5
11	SP	Training	525.28	326.5	198.778	146.56	96.8333	49.7222
12	SP	Training	498.83	332.833	166	129.25	99.5833	29.6667
1	SI	Day 1	531.35	236.333	216.847	73.5	49.5	24
2	SI	Day 1	518	313	205	112.83	81	31.8333
3	SI	Day 1	542.68	307.667	235.013	110.5	67.5	43
4	SI	Day 1	542.5	317	225.5	133.33	74.6667	58.6667
5	SI	Day 1	537.01	311.083	225.93	92	58.5	33.5
6	SI	Day 1	542.5	317	225.5	133.33	74.6667	58.6667
7	SP	Day 1	464.33	263.167	201.167	143.5	100.833	42.6667
8	SP	Day 1	515.55	305.333	210.22	120.69	76.3333	44.3521
9	SP	Day 1	567.33	336	231.333	101.83	78.1667	23.6667
10	SP	Day 1	543	339.667	203.333	104.5	68.3333	36.1667
11	SP	Day 1	507.63	302.722	204.907	122.9	81.8333	41.0618
12	SP	Day 1	376.18	228.667	147.513	56.83	36.8333	20
1	SI	Day 14	439.83	314.5	203.5	76.17	32.5	43.6667
2	SI	Day 14	535.92	316.667	219.25	106.83	77.8333	29
3	SI	Day 14	488.58	321.736	166.847	105.14	63.9721	41.1667
4	SI	Day 14	487.67	256.5	231.17	134.17	70.8333	63.3333
5	SI	Day 14	464.21	279.035	185.173	90.65	48.2361	42.4167
6	SI	Day 14	487.67	256.5	231.17	134.17	70.8333	63.3333
7	SP	Day 14	408.17	282	126.167	117.68	90.8467	26.8333
8	SP	Day 14	483.5	301.667	181.833	96.67	76.5	20.1667
9	SP	Day 14	450.58	287.222	163.361	107.45	82.6156	24.8333
10	SP	Day 14	555.67	372.667	183	102.33	71.8333	30.5
11	SP	Day 14	482.44	318.778	163.667	105.56	79.7267	25.8333
12	SP	Day 14	460.08	278	182.083	108	80.5	27.5
